# Supplementary material for: Putative Iron-Sulfur Proteins Are Required for Hydrogen Consumption and Enhance Survival of Mycobacteria
Source: Front Microbiol. 2019 Nov 22;10:2749. doi: 10.3389/fmicb.2019.02749 (PMC6883350; doi:10.3389/fmicb.2019.02749)
Supplement: Supplementary file 2 [file Data_Sheet_2.xlsx]

## Sheet: Summary
Organism	Phylum	Hydrogenase	FeS protein
Solibacter usitatus	Acidobacteriota	[NiFe] Group 1h	Absent
Thermomicrobium roseum	Chloroflexota	[NiFe] Group 1h	Absent
Nannocystis exedens	Myxococcota	[NiFe] Group 1h	Absent
Caballeronia sordidicola	Proteobacteria	[NiFe] Group 1h	Absent
Methylocystis parvus	Proteobacteria	[NiFe] Group 1h	Absent
Methylocystis sp. SB2	Proteobacteria	[NiFe] Group 1h	Absent
Methylocystis sp. SC2	Proteobacteria	[NiFe] Group 1h	Absent
Methylosinus trichosporium	Proteobacteria	[NiFe] Group 1h	Absent
Methylacidiphilum fumariolicum	Verrucomicrobiota	[NiFe] Group 1h	Absent
Pyrinomonas methylaliphatogenes	Acidobacteriota	[NiFe] Group 1h	Full
Actinocrispum wychmicini	Actinobacteriota	[NiFe] Group 1h	Full
Amycolatopsis decaplanina	Actinobacteriota	[NiFe] Group 1h	Full
Amycolatopsis taiwanensis	Actinobacteriota	[NiFe] Group 1h	Full
Amycolicicoccus subflavus	Actinobacteriota	[NiFe] Group 1h	Full
Arthrobacter globiformis	Actinobacteriota	[NiFe] Group 1h	Full
Asanoa ishikariensis	Actinobacteriota	[NiFe] Group 1h	Full
Conexibacter woesei	Actinobacteriota	[NiFe] Group 1h	Full
Gordonia rhizosphera	Actinobacteriota	[NiFe] Group 1h	Full
Hoyosella subflava	Actinobacteriota	[NiFe] Group 1h	Full
Kitasatospora albolonga	Actinobacteriota	[NiFe] Group 1h	Full
Kribbella sindirgiensis	Actinobacteriota	[NiFe] Group 1h	Full
Kutzneria buriramensis	Actinobacteriota	[NiFe] Group 1h	Full
Mycobacterium avium	Actinobacteriota	[NiFe] Group 1h	Full
Mycobacterium chubuense	Actinobacteriota	[NiFe] Group 1h	Full
Mycobacterium colombiense	Actinobacteriota	[NiFe] Group 1h	Full
Mycobacterium indicus	Actinobacteriota	[NiFe] Group 1h	Full
Mycobacterium kansasii	Actinobacteriota	[NiFe] Group 1h	Full
Mycobacterium liflandii	Actinobacteriota	[NiFe] Group 1h	Full
Mycobacterium marinum	Actinobacteriota	[NiFe] Group 1h	Full
Mycobacterium parascrofulaceum	Actinobacteriota	[NiFe] Group 1h	Full
Mycobacterium rhodesiae	Actinobacteriota	[NiFe] Group 1h	Full
Mycobacterium smegmatis	Actinobacteriota	[NiFe] Group 1h	Full
Mycobacterium thermoresistibile	Actinobacteriota	[NiFe] Group 1h	Full
Mycobacterium tusciae	Actinobacteriota	[NiFe] Group 1h	Full
Mycobacterium vaccae	Actinobacteriota	[NiFe] Group 1h	Full
Mycobacterium xenopi	Actinobacteriota	[NiFe] Group 1h	Full
Mycobacterium yongonense	Actinobacteriota	[NiFe] Group 1h	Full
Nocardia nova	Actinobacteriota	[NiFe] Group 1h	Full
Nocardiopsis salina	Actinobacteriota	[NiFe] Group 1h	Full
Pseudonocardia asaccharolytica	Actinobacteriota	[NiFe] Group 1h	Full
Pseudonocardia spinosispora	Actinobacteriota	[NiFe] Group 1h	Full
Rhodococcus equi	Actinobacteriota	[NiFe] Group 1h	Full
Rhodococcus erythropolis	Actinobacteriota	[NiFe] Group 1h	Full
Rhodococcus imtechensis	Actinobacteriota	[NiFe] Group 1h	Full
Rhodococcus jostii	Actinobacteriota	[NiFe] Group 1h	Full
Rhodococcus opacus	Actinobacteriota	[NiFe] Group 1h	Full
Rhodococcus qingshengii	Actinobacteriota	[NiFe] Group 1h	Full
Rhodococcus ruber	Actinobacteriota	[NiFe] Group 1h	Full
Saccharopolyspora spinosa	Actinobacteriota	[NiFe] Group 1h	Full
Sciscionella marina	Actinobacteriota	[NiFe] Group 1h	Full
Smaragdicoccus niigatensis	Actinobacteriota	[NiFe] Group 1h	Full
Streptomyces niveus	Actinobacteriota	[NiFe] Group 1h	Full
Nitrolancea hollandica	Chloroflexota	[NiFe] Group 1h	Full
Sphaerobacter thermophilus	Chloroflexota	[NiFe] Group 1h	Full
Thermogemmatispora sp. T81	Chloroflexota	[NiFe] Group 1h	Full
Candidatus Dormibacterota bacterium	Dormibacterota	[NiFe] Group 1h	Full
Candidatus Eremiobacterota bacterium	Eremiobacterota	[NiFe] Group 1h	Full
Sulfobacillus thermosulfidooxidans	Firmicutes	[NiFe] Group 1h	Full
Schlesneria paludicola	Planctomycetota	[NiFe] Group 1h	Full
Pedosphaera parvula	Verrucomicrobiota	[NiFe] Group 1h	Full
Edaphobacter modestus	Acidobacteriota	[NiFe] Group 1h	Truncated
Granulicella mallensis	Acidobacteriota	[NiFe] Group 1h	Truncated
Actinocorallia populi	Actinobacteriota	[NiFe] Group 1h	Truncated
Actinomadura madurae	Actinobacteriota	[NiFe] Group 1h	Truncated
Actinomadura rifamycini	Actinobacteriota	[NiFe] Group 1h	Truncated
Actinomycetospora chiangmaiensis	Actinobacteriota	[NiFe] Group 1h	Truncated
Actinoplanes globisporus	Actinobacteriota	[NiFe] Group 1h	Truncated
Allokutzneria albata	Actinobacteriota	[NiFe] Group 1h	Truncated
Amycolatopsis balhimycina	Actinobacteriota	[NiFe] Group 1h	Truncated
Amycolatopsis mediterranei	Actinobacteriota	[NiFe] Group 1h	Truncated
Amycolatopsis vancoresmycina	Actinobacteriota	[NiFe] Group 1h	Truncated
Blastococcus saxobsidens	Actinobacteriota	[NiFe] Group 1h	Truncated
Catellatospora citrea	Actinobacteriota	[NiFe] Group 1h	Truncated
Couchioplanes caeruleus	Actinobacteriota	[NiFe] Group 1h	Truncated
Frankia alni	Actinobacteriota	[NiFe] Group 1h	Truncated
Frankia sp. BCU110501	Actinobacteriota	[NiFe] Group 1h	Truncated
Frankia sp. CN3	Actinobacteriota	[NiFe] Group 1h	Truncated
Frankia sp. EAN1pec	Actinobacteriota	[NiFe] Group 1h	Truncated
Frankia sp. EuI1c	Actinobacteriota	[NiFe] Group 1h	Truncated
Frankia sp. EUN1f	Actinobacteriota	[NiFe] Group 1h	Truncated
Frankia sp. QA3	Actinobacteriota	[NiFe] Group 1h	Truncated
Halopolyspora algeriensis	Actinobacteriota	[NiFe] Group 1h	Truncated
Lentzea waywayandensis	Actinobacteriota	[NiFe] Group 1h	Truncated
Microtetraspora malaysiensis	Actinobacteriota	[NiFe] Group 1h	Truncated
Nonomuraea coxensis	Actinobacteriota	[NiFe] Group 1h	Truncated
Prauserella shujinwangii	Actinobacteriota	[NiFe] Group 1h	Truncated
Saccharomonospora azurea	Actinobacteriota	[NiFe] Group 1h	Truncated
Saccharomonospora cyanea	Actinobacteriota	[NiFe] Group 1h	Truncated
Saccharomonospora glauca	Actinobacteriota	[NiFe] Group 1h	Truncated
Saccharomonospora halophila	Actinobacteriota	[NiFe] Group 1h	Truncated
Saccharomonospora marina	Actinobacteriota	[NiFe] Group 1h	Truncated
Saccharomonospora saliphila	Actinobacteriota	[NiFe] Group 1h	Truncated
Saccharomonospora viridis	Actinobacteriota	[NiFe] Group 1h	Truncated
Saccharomonospora xinjiangensis	Actinobacteriota	[NiFe] Group 1h	Truncated
Saccharopolyspora erythraea	Actinobacteriota	[NiFe] Group 1h	Truncated
Sinosporangium album	Actinobacteriota	[NiFe] Group 1h	Truncated
Solirubrobacter soli	Actinobacteriota	[NiFe] Group 1h	Truncated
Solirubrobacter sp. URHD0082	Actinobacteriota	[NiFe] Group 1h	Truncated
Sphaerisporangium album	Actinobacteriota	[NiFe] Group 1h	Truncated
Streptomyces afghaniensis	Actinobacteriota	[NiFe] Group 1h	Truncated
Streptomyces albulus	Actinobacteriota	[NiFe] Group 1h	Truncated
Streptomyces auratus	Actinobacteriota	[NiFe] Group 1h	Truncated
Streptomyces avermitilis	Actinobacteriota	[NiFe] Group 1h	Truncated
Streptomyces bottropensis	Actinobacteriota	[NiFe] Group 1h	Truncated
Streptomyces canus	Actinobacteriota	[NiFe] Group 1h	Truncated
Streptomyces cattleya	Actinobacteriota	[NiFe] Group 1h	Truncated
Streptomyces clavuligerus	Actinobacteriota	[NiFe] Group 1h	Truncated
Streptomyces collinus	Actinobacteriota	[NiFe] Group 1h	Truncated
Streptomyces davawensis	Actinobacteriota	[NiFe] Group 1h	Truncated
Streptomyces griseoflavus	Actinobacteriota	[NiFe] Group 1h	Truncated
Streptomyces hygroscopicus	Actinobacteriota	[NiFe] Group 1h	Truncated
Streptomyces roseochromogenes	Actinobacteriota	[NiFe] Group 1h	Truncated
Streptomyces scabiei	Actinobacteriota	[NiFe] Group 1h	Truncated
Streptomyces scabrisporus	Actinobacteriota	[NiFe] Group 1h	Truncated
Streptomyces sviceus	Actinobacteriota	[NiFe] Group 1h	Truncated
Streptomyces tsukubaensis	Actinobacteriota	[NiFe] Group 1h	Truncated
Streptomyces viridochromogenes	Actinobacteriota	[NiFe] Group 1h	Truncated
Streptosporangium roseum	Actinobacteriota	[NiFe] Group 1h	Truncated
Thermoactinospora rubra	Actinobacteriota	[NiFe] Group 1h	Truncated
Thermobispora bispora	Actinobacteriota	[NiFe] Group 1h	Truncated
Thermomonospora curvata	Actinobacteriota	[NiFe] Group 1h	Truncated
Dictyobacter aurantiacus	Chloroflexota	[NiFe] Group 1h	Truncated
Ktedonobacter racemifer	Chloroflexota	[NiFe] Group 1h	Truncated
Singulisphaera acidiphila	Planctomycetota	[NiFe] Group 1h	Truncated
Paraburkholderia sediminicola	Proteobacteria	[NiFe] Group 1h	Truncated
Ralstonia eutropha	Proteobacteria	[NiFe] Group 1h	Truncated
Cecembia lonarensis	Bacteroidota	[NiFe] Group 2a	Absent
Emticicia oligotrophica	Bacteroidota	[NiFe] Group 2a	Absent
Flectobacillus major	Bacteroidota	[NiFe] Group 2a	Absent
Runella limosa	Bacteroidota	[NiFe] Group 2a	Absent
Runella slithyformis	Bacteroidota	[NiFe] Group 2a	Absent
Runella zeae	Bacteroidota	[NiFe] Group 2a	Absent
Spirosoma linguale	Bacteroidota	[NiFe] Group 2a	Absent
Zobellia galactanivorans	Bacteroidota	[NiFe] Group 2a	Absent
Cylindrospermopsis raciborskii	Cyanobacteriota	[NiFe] Group 2a	Absent
Dolichospermum circinale	Cyanobacteriota	[NiFe] Group 2a	Absent
Microchaete sp. PCC 7126	Cyanobacteriota	[NiFe] Group 2a	Absent
Azonexus hydrophilus	Proteobacteria	[NiFe] Group 2a	Absent
Euzebya rosea	Actinobacteriota	[NiFe] Group 2a	Full
Gordonia polyisoprenivorans	Actinobacteriota	[NiFe] Group 2a	Full
Gordonia rhizosphera	Actinobacteriota	[NiFe] Group 2a	Full
Kineosphaera limosa	Actinobacteriota	[NiFe] Group 2a	Full
Mycobacterium hassiacum	Actinobacteriota	[NiFe] Group 2a	Full
Mycobacterium iranicum	Actinobacteriota	[NiFe] Group 2a	Full
Mycobacterium phlei	Actinobacteriota	[NiFe] Group 2a	Full
Mycobacterium smegmatis	Actinobacteriota	[NiFe] Group 2a	Full
Mycobacterium thermoresistibile	Actinobacteriota	[NiFe] Group 2a	Full
Mycobacterium tusciae	Actinobacteriota	[NiFe] Group 2a	Full
Mycobacterium vanbaalenii	Actinobacteriota	[NiFe] Group 2a	Full
Nocardioides sp. J54	Actinobacteriota	[NiFe] Group 2a	Full
Pseudonocardia asaccharolytica	Actinobacteriota	[NiFe] Group 2a	Full
Pseudonocardia dioxanivorans	Actinobacteriota	[NiFe] Group 2a	Full
Streptomyces bottropensis	Actinobacteriota	[NiFe] Group 2a	Full
Thermobispora bispora	Actinobacteriota	[NiFe] Group 2a	Full
Hydrogenobacter thermophilus	Aquificota	[NiFe] Group 2a	Full
Thermocrinis albus	Aquificota	[NiFe] Group 2a	Full
Chloroflexus aggregans	Chloroflexota	[NiFe] Group 2a	Full
Chloroflexus sp. Y-396-1	Chloroflexota	[NiFe] Group 2a	Full
Kouleothrix aurantiaca	Chloroflexota	[NiFe] Group 2a	Full
Roseiflexus castenholzii	Chloroflexota	[NiFe] Group 2a	Full
Anabaena cylindrica	Cyanobacteriota	[NiFe] Group 2a	Full
Anabaena variabilis	Cyanobacteriota	[NiFe] Group 2a	Full
Aulosira laxa	Cyanobacteriota	[NiFe] Group 2a	Full
Calothrix brevissima	Cyanobacteriota	[NiFe] Group 2a	Full
Calothrix sp. PCC 7103	Cyanobacteriota	[NiFe] Group 2a	Full
Candidatus Melainabacteria bacterium	Cyanobacteriota	[NiFe] Group 2a	Full
Chlorogloeopsis fritschii	Cyanobacteriota	[NiFe] Group 2a	Full
Crocosphaera watsonii	Cyanobacteriota	[NiFe] Group 2a	Full
Cyanothece sp. ATCC 51142	Cyanobacteriota	[NiFe] Group 2a	Full
Cyanothece sp. CCY0110	Cyanobacteriota	[NiFe] Group 2a	Full
Cyanothece sp. PCC 7424	Cyanobacteriota	[NiFe] Group 2a	Full
Cyanothece sp. PCC 7822	Cyanobacteriota	[NiFe] Group 2a	Full
Fortiea contorta	Cyanobacteriota	[NiFe] Group 2a	Full
Leptolyngbya ohadii	Cyanobacteriota	[NiFe] Group 2a	Full
Lyngbya aestuarii	Cyanobacteriota	[NiFe] Group 2a	Full
Lyngbya sp. PCC 8106	Cyanobacteriota	[NiFe] Group 2a	Full
Mastigocoleus testarum	Cyanobacteriota	[NiFe] Group 2a	Full
Nodularia spumigena	Cyanobacteriota	[NiFe] Group 2a	Full
Nostoc punctiforme	Cyanobacteriota	[NiFe] Group 2a	Full
Nostoc sp. PCC 7107	Cyanobacteriota	[NiFe] Group 2a	Full
Okeania hirsuta	Cyanobacteriota	[NiFe] Group 2a	Full
Richelia intracellularis	Cyanobacteriota	[NiFe] Group 2a	Full
Sphaerospermopsis kisseleviana	Cyanobacteriota	[NiFe] Group 2a	Full
Trichormus azollae	Cyanobacteriota	[NiFe] Group 2a	Full
Thermus thermophilus	Deinococcota	[NiFe] Group 2a	Full
Aeribacillus pallidus	Firmicutes	[NiFe] Group 2a	Full
Alicyclobacillus macrosporangiidus	Firmicutes	[NiFe] Group 2a	Full
Aneurinibacillus terranovensis	Firmicutes	[NiFe] Group 2a	Full
Effusibacillus lacus	Firmicutes	[NiFe] Group 2a	Full
Geobacillus thermoglucosidasius	Firmicutes	[NiFe] Group 2a	Full
Hydrogenibacillus schlegelii	Firmicutes	[NiFe] Group 2a	Full
Kyrpidia tusciae	Firmicutes	[NiFe] Group 2a	Full
Sulfobacillus acidophilus	Firmicutes	[NiFe] Group 2a	Full
Thermicanus aegyptius	Firmicutes	[NiFe] Group 2a	Full
Gemmatimonas aurantiaca	Gemmatimonadota	[NiFe] Group 2a	Full
Nitrospira moscoviensis	Nitrospirota	[NiFe] Group 2a	Full
Acidithiobacillus ferrooxidans	Proteobacteria	[NiFe] Group 2a	Full
Mesorhizobium opportunistum	Proteobacteria	[NiFe] Group 2a	Full
Methylocapsa acidiphila	Proteobacteria	[NiFe] Group 2a	Full
Methyloceanibacter methanicus	Proteobacteria	[NiFe] Group 2a	Full
Methylocella silvestris	Proteobacteria	[NiFe] Group 2a	Full
Methyloferula stellata	Proteobacteria	[NiFe] Group 2a	Full
Novosphingobium pentaromativorans	Proteobacteria	[NiFe] Group 2a	Full
Phreatobacter oligotrophus	Proteobacteria	[NiFe] Group 2a	Full
Pseudaestuariivita atlantica	Proteobacteria	[NiFe] Group 2a	Full
Sinimarinibacterium flocculans	Proteobacteria	[NiFe] Group 2a	Full
Sphingopyxis alaskensis	Proteobacteria	[NiFe] Group 2a	Full
Tistlia consotensis	Proteobacteria	[NiFe] Group 2a	Full
Frankia alni	Actinobacteriota	[NiFe] Group 2a	Truncated
Frankia sp. QA3	Actinobacteriota	[NiFe] Group 2a	Truncated
Fischerella muscicola	Cyanobacteriota	[NiFe] Group 2a	Truncated
Fischerella sp. PCC 9431	Cyanobacteriota	[NiFe] Group 2a	Truncated
Fischerella sp. PCC 9605	Cyanobacteriota	[NiFe] Group 2a	Truncated
Mastigocladopsis repens	Cyanobacteriota	[NiFe] Group 2a	Truncated
Nostoc sp. PCC 7120	Cyanobacteriota	[NiFe] Group 2a	Truncated
Nostoc sp. PCC 7524	Cyanobacteriota	[NiFe] Group 2a	Truncated
Oscillatoria sp. PCC 10802	Cyanobacteriota	[NiFe] Group 2a	Truncated
Rivularia sp. PCC 7116	Cyanobacteriota	[NiFe] Group 2a	Truncated
Scytonema hofmanni	Cyanobacteriota	[NiFe] Group 2a	Truncated
Scytonema tolypothrichoides	Cyanobacteriota	[NiFe] Group 2a	Truncated
Trichodesmium erythraeum	Cyanobacteriota	[NiFe] Group 2a	Truncated

## Sheet: FASTA
>WP_028460303.1 - HupE protein - Chloroflexus sp. Y-396-1
MTQSHTVADDLESVAARVDAAVAAVAKLEPSAQAVALELKQAIEAFHKLALTTMVRHLKQDPRGKELLLELVADPAVYALLVMHGIVRADPLTRARRVLDNARPYMQSHGGDAELVDVRDGVAYLRLHGSCNGCSLSAFTLRKHVEEVLLREVPEISRLEVLTDQPAPTILRPEAQMSPDETKGWVRGPAVSEVPSGQMMSIPTERGNVLIVNLANRLSAYRNACAHQGRPLDGGMLDPENGTLTCPWHGFCFDVASGECLTAPQAQLEPFPLRVVDGIIWVRPQ
>PMP83916.1 - HupE protein - Roseiflexus castenholzii
MTIPPNGHDTAIDALERLALRIDQAIAAAGKLDDQARECALELQRAIETFHKEALTRIVRRLKDDPRGKELLFEMVDDPLIYALFARHEIVRPNIVARVSRVLDAARPYIRSHGGDVELVEVRENVVYVRLHGSCNGCSLSAVTLRNEIEAALRANVPEIAGVQVVAADAVPALIMPESIGVRDPLAGWVAGPPASDVPPGAMRRLETDHADILIINLDGRLSAFRNACAHQGLPLDGGLLDPESGTLTCPWHGFCYDAGSGECLTAPQAQLEPFPLRVEQGRIWVRPTQG
>WP_012615783.1 - HupE protein - Chloroflexus aggregans
MTQTVPDDTGLLEQAAARVDAAVAAANKLEPTAQTVATELKHAIEAFHKLALNTIVRRLKQDPHGKAILFELVEDPAVYALLLMHGIVRADPVTRARRVLDNARPYMQSHGGDAELVDVRDGVAYVRLHGSCNGCSLSAFTLRKHVEEALLREVPEMTRLEVVTDQATPAILRAEAQEMPAVEKGWVRGPAVTEVPPGQMVSITTERGSVLIVNFANRLSAYRNACAHQGRPLNDGILDPITGTLTCRWHGFCFDLQSGECLTAPQAQLEPFPLRVVDGIIWVRPQ
>WP_012681897.1 - HupE protein - Gemmatimonas aurantiaca
MTATAPLPVASASPSGTSDATLETLATNVQRTLDDVRGMPIDQRTRALALKDALEAFHKAGLTTIVRALKQDPRGKELLFELIDDPGVYALLSLHGIVKADMRTRVARVVENLRPYTQSHGGDVTLVDVTSDTVFVKLSGSCNGCSMSSVTLRNGIEEALKEQVPEITRIEVVPNEPDAAAAFVTLTRAPRGDGWVDGPLLEELQDARPYRHEVADGRSIVILRLDDAITAYWNECAHMGLPIDGGMVDREARTITCPWHGFRFDCGTGECLSAPQAQLEALPVRVDGGRVQLRPT
>WP_013876971.1 - HupE protein - Parageobacillus thermoglucosidasius
MKVQQEENFQALAERVDRVLDSIKGLPEDARMKAMELKKAIEAFHEHALRKLVRTFRETEEGKELLLKAVEDPSIYAMFLLHGIIKQDLFTRVAAALEEVRPYMRSHGGGVELVEVEGKTAYVRLQGACSGCSLSAVTLKNGVEEAIKARVPEIEHVVMVEEEVASGYLPFHAMNDTGNLEQNGWVQGPSVSELEEVHPVRFSHEDHDILLVRMDRKVMAFRNQCPHMGMPLDGGMTDGAVITCPWHGFRFDLSTGECMTAPHVQLEPFPVRVEDQKIWIRLG
>WP_066248146.1 - HupE protein - Aeribacillus pallidus
MKVQQEEDFQALAGRVDRVLDSIKGLPEDARMKAMELKKAIEAFHEHALRKLVRTFRETEAGKELLLKAAEDPSIYAMFLMHGIIKQDLFTRTAAALEEVRPYMRSHGGGVELVKVEGNTVYVRLQGACSGCSLSAMTLKNGIEEAIKARVPEIEHVVMVEEEVTSGYMPFHAMNDTGNLEQNGWVQGPSASELEEGSPVRFSHEELDVLLVRLEGKVMAFRNQCPHMGMSLDGGLVDNSIITCPWHGFRFDLSTGECMTAPHVQLEPFPVRVEDEKIWIRLS
>WP_028986321.1 - HupE protein - Thermicanus aegyptius
MQTKQEDFHALAERVDRELAMVKELPEDSRRKAMELKKAVEAFHAHALRQLVRTFRESDAGKELLLKAVEDPAVYAMFLMHGIIKPDLFTRVAAVLEEVRPYMRSHGGDVELVKVEGETVYVRLQGACSGCSLSAVTLKNGVEEAIKARLPEIAYVVMVEDEVASGYLPPHAADPAGALEQNGWLQGPAIRELEEGRPLRFAREEGDILVVRIEGKVMAFRNQCPHMGMPLDGGFVDGSVMTCPWHGFRFDLSTGECMTAPHVQLEPFPVRVEDRRIWIRLG
>WP_013076462.1 - HupE protein - Kyrpidia tusciae
MQLDDFGVLAANVDRAAEAIQGLSEDARQKAMEMKKAIEAFHEHALRRLVRTLRTTESGKELLLQAVEDPAVYAMFLMHGIIKQDLFTRVAAVLEEVRPYMRSHGGDVELVKVEADVVYVRLHGACSGCSLSALTLRDGVEEAVKARVPEVRRVEVAEDETVAGFIPLDDVDGLGNSGWLEGPPVELLADGRPFRFEQGGHNVLLIRVGPKIMAYRNQCPHMGMPLDKGLVEGEVLTCPWHGFRYDLSTGECLTAPHVQLEPFPVRVEEQRVWVRPG
>AEJ40453.1 - HupE protein - Sulfobacillus acidophilus TPY
MQIEDRLDEFESLARQVDDALSAVQKLDQTAQEAAMKLKESLEAFERYALIRLVRRMRDDPAGKNILLDAVGDPAIYALFLVHGIVKSDIRTRVFQALEQVRPYINSHGGDVELIRVENHTVFVKLHGSCSGCGMSSQTLHNLVEKTIQEHVPEIEAIEVEDEESSGGQGAFIPLSAINLGGDWIQALEYAEMVNGVPYRIHRDDIDAIIVRFNEQVSAYVNRCAHMQMPVDKGLVEGHILTCPWHGYQYDLKTGECRTVPGLRLDPVPVRLEGGSVWVRPRL
>WP_027417156.1 - HupE protein - Aneurinibacillus terranovensis
MKVMQEDFNALAERVDRELSSIKELPEDACRKAMELKKAIEAFHEHGLRKLVRTFRETDAGKELLLKAVEDPAVYAMLFMHGIIKQDLFTRVAAVLEEVRPYMRSHGGDVELVKVEGETVYVRLQGACSGCSMSAVTLKNGVEEAIKARVPEIEYVIMAGDEVASGYLPIHAIDDAESLEQSGWKQGPSISELEEGRPVHFAHEEWDVLLVRIEGKVMAFRNQCPHMSMPLDKGLVDGSAITCPWHGFRFDLSTGECITAPHVQLEPFPVRVEDQRVWIRLS
>WP_029421090.1 - HupE protein - Alicyclobacillus macrosporangiidus
MKVLEEDFTTLAERVDRALASIRDMPESEREKAMELKKSIEAFHELALRKIVRALRETEAGKEVLLKVVEDPAVYAVLLMHGIIKQDLFTRVATVIEEVRPYMQSHGGDVELVKVEGNTVYVRLNGACSGCSLSAVTLKRSVEEAIKARVPEIEYVLMAKDELASGFMPPGIVGADVNLEQSGWVQGPPTSELEEARPVRVVHDEYDLLVVRVDGKVMAFRNSCPHMGLPLHKGLVDGTVLVCPGHGFRFDLTSGECLTAPYVQLEPFPVRVEDHRVWMRLD
>KPV51540.1 - HupE protein - Kouleothrix aurantiaca
MGATMDFEQLAEQVDRLTEEVLRIEDEGARESAIRLKEAVEAIHREALVQIVRRLKEDDATLAALRELAREPAVRMVLMLHELIKPPLGTRVQPALDEVRPYIHSHGGDVELVELVDGTARLRLSGACQGCPGSTMTLRNGVEQALRRHAPELVGIELVEEERAAGALIALDAISVAGSAARLPDPAGGWRLAMPLAQLSAAGVTRAEIDGVDVLLAQPNGKLVCYRNVCAHMSMPLDAGEVSNGVLTCPWHGFQYDLESGECLTAPEVQLEPVPVRARAGIVEVRLAGVASL
>WP_096180897.1 - HupE protein - Effusibacillus lacus
MRVEQEDFQALAEHVDRVLDSIKELPEDTRAKALELKKAIEAFHEHALRKLVRTIRETDAGKGLLLKAVEDSAVYAMLFMHGIIKQDLFTRVAVVLEEVRPYMRSHGGDVELVKVEGETVYVRLHGACSGCSMSAKTLKDGVEEAIKARIPEIEEVVMAEEEVDTGYMLLPVLDDAGNLEQNGWLRGPSISQLEEGRQVRVSLEECDILLVRIDGKVMAFRNQCPHMGMSLDGGLVDGNAITCPWHGFRFNLSTGECITAPHMQLEPFPVRVEDQWIWVRIG
>WP_025306154.1 - HupE protein - Thermocrinis ruber
MTEELSFEKLAERIDELFKKVRDFEDEKREIVGELVKSIEEFTKIALVKLVRFMKEDPTGKELLLKAVKEPEVYSLFLKHGLIREDDRIKAIKALELIKPYIRSHGGDVEFVDLKDKVLYVRLKGACTGCSQVSFTLQQTILEAVQSFVPYIERVELAKDTPVEAFIEFSQKKEDYIKAFNVSELKEGHVYRFLHEKIDVILVLWKGKIYAYRNSCAHQGLPLHDGELTKEGILICPWHNFEYSITSGECLTANHVQLVPVYTRIENGYVWLKVE
>WP_012963098.1 - HupE protein - Hydrogenobacter thermophilus
MTEELSFEKLAERIDELLAKVKNFEDEKRETVGELIKSIEEFTRMALVKLVKLMKEDSAGKDILLKAVREPEIYSLFLKHGIIREDDRTKAIKALELIRPYIRSHGGDVEFVDLKEKTLYVRLRGTCTGCSQVSFTLQQTILEAVQAYIPHIEKVELAKDTPVEAFLELSGKEEGYIKAFDISELKEGHVYRFLHEGVDVILMLWKGRVYAYRNSCAHQGHPLHEGELTEKGVLVCPWHRFEYSITSGECLTVPYVQLVSVPTKIQNGWVLLKVR
>PZM80338.1 - HupE protein - Candidatus Melainabacteria bacterium
MQRDTNAGFVSLEKELKDIELLEQIIAGWENEQKNTVEALRHSVDRLSKEALSRIIKKMKEDPVTLGALKEVLGDEVVYAVLRYHQLVKPSLQERVELALSTVRPMLATHGGNVELVEIEAPSTAIIRLLGACSGCPASELTLSEGVEKAIREYCPEIQEIRKAPAICSNESVAVNFISPFARSESVGWVFAAQLDDVPENRIKTVDVSGQSVILVRSAGRVMCYQNACAHLGMPLDMGQIENGVLTCPHHGFKYALDSGECLTAPVVQLQTHAVRITNDRVEVRIE
>WP_050532483.1 - HupE protein - Pseudaestuariivita atlantica
MADGGTETQERTLGEMLRDIEALTSLADTWDDAARKGAQARAEAIDALNAEAFRRLIRHLQSVAGMSEALRSAASDEVIYAVLRRHGILRPSLFERVDEALNSVRPMLASHGGDAELVSVDDTSAVVRFLGACDGCPASALTFYSGVKKAIQEQVPQIKEVKQAKGLGGGSSDQVHFTSPFAAYQNDGWSKAADLAEVPDGETKVFEVDGHSVFISRFGDRVTCFENACAHMGMAMDGGEIADGFITCPYHQFQYSLESGECLTAPEVQLQPHGVRVVGDHIEIRVTK
>WP_053382025.1 - HupE protein - Nitrospira moscoviensis
MEKQESTVLETQPTLASLVKSIKSLEVIVEGWNDSQRLTVQALRKAIEDLHKEAFSRLIRGIKADPAAIPALRQAVGDEIVYAVLRHLGLLKPSLNERIERALASVRPLLQGHGGNVELVRVDPPDSVEIKLLGACDGCPASGLTLAEGIEKAIREHCPEIITIKKVKGIPPSSNVNGASVFFVSPFARSSDAGWQFAVELAEIPDIGIKVLELAGHSLLFSRTDQVVTCFENACAHMGMPLDMGLIADGVITCPYHGFRYDLSSGECLTAPEVQLVSHAVRVVGSKVEVKLRS
>WP_020176866.1 - HupE protein - Methyloferula stellata
MNAHAHPSAENEPSFDSLTGDIERFAALIANWEESQRTVAFAHRQAIDALHKAALRKLIAEVKVAPGALDALRRAASDPLVYGVLRYHGLIQPSQQERLDTALASVRPMLAAHGGDVELVAFVPPDTVEVRFLGNCDGCSASTMTFVAGVKRAIEEHCPEIKQVRQVKSAASSVTKANFTSPFVDTGIWTLAILLDTIPEEGIATAAVEGTPLLFARKDGIVSCFQDACAHLGLPVSGGPVGDGFIRCPFHGFKYDLMTGECLTAPEVQLRSVPVRVDGNRVEIRLEV
>WP_102842095.1 - HupE protein - Methylocella silvestris
MNAVDIIATKRDDLAGFAGDIERLETIFSTWDATQRGAVEAYRRAVEDLNGEALRRLVRILKQEPAALAAMKQAATDEIVYAVLRRHNILKPSLSERVEAALEGVRPMLAAHGGDVELVSVRPPAIEVRFVGACDGCPASSMTFHAGVKKAVAEACPEITDILQVKGVSHAGAGNVHFISPFAHGAADGWRFVCRIDEIPQGGVSAITIDGRDVILSRQGAALSCFENACAHLGLPLDGGEIAHGVITCPYHGFQYDLSSGECLTAPEVALQPHAVRVVGHCVEVRLSS
>WP_069437343.1 - HupE protein - Methyloceanibacter methanicus
MNVVDPTPTKRNDLAELLSDVERLESIFAAWDETPRNAVIAYRTAIEALHGEALTRLVRALKDDPAALAAMKRAIGDEIVYAVLRRHGILKASLVERIEVALAGIRPMLASHGGDVELVKVAPPAIEVRFLGACDGCPASQLTFHAGVKKAVEDACPEITEVLQAKGSGLVNRDSAHFVSPFANQSASDWHEAGKLGEIPDGGVRSLTVGGEKVLLARRGAAVTCFQNACAHLGFPIHDGEIADGIVTCPHHGFQYDLASGECLTAPEVALQSHAVRVSGDKVEVRLSV
>RTL39477.1 - HupE protein - Candidatus Melainabacteria bacterium
MTGSIAEELTLEKLLKDIEALDSIVATWDEHERRTVQALRKAIDDLNKEALARVIRGLKQSPEALAALKEVTADEIVYSVLRHHELIKPSLQERIEKALESVRPMLQGHGGNVELVEVEPPNKAVVRLIGACSNCPASELTLSEGVEKAIKEQCPEITEIVKAKGICSSTDAKPVNFISPFAQGKEKRWSFVANLDELPENQLIVKEIEGQSVILARLEDNVVCYQNACAHLGMPLDMSEVKDGVLTCSYHAFEYVLKTGECLTVPEVQLHTHAVRVVDQKVEVSLS
>ABF54908.1 - HupE protein - Sphingopyxis alaskensis RB2256
MPGAWWAACFSLTSTGTSSTPDPMSEADPQRPEPTLSRLLGDLTALEALAENWEEGARNGAQARAAALDALNAEAFRRLIRSLRELPGAAEALRQAAADEVVYCVLRRHGILKASLFERVDAALATVRPTLAGHGGDAELVEVSGDKAVVRFLGACDGCPASALTFYAGVKKAITEQVPEIREVKQAKGLGGGGGDTVHFTSPFAAHEHEGWLHALQLTELPDGTTSVLELEGRSLLLSRFGDKVTCFENACAHLGMPMDQAEIADGFITCPHHGFRYALESGECLTAPEVQLQPHAVRVRGDAIELRLTR
>WP_093283356.1 - HupE protein - Solimonas aquatica
MNATPQAQGEASGAGERELDALVQDIARLEAVVAGWEPAQQAGVQALKQAIEALHKEALRRLIRRLKQEPAAATALREALGEPLIWAVLLHHGLVREPLEARVRKALEDVQPYMAAHGGGVELVAVKAPDTVEIRLTGACHSCPASSTTLSQGVEKALREHCPEIQHIRQVSRGQDACASPDNPAVHYISPFALNAKGGWQDLALLTEIPERGVLERTLKGRSLLLSRQGDAVSCFDNRCAHLGMPLDMGEVREGVIRCPYHGFEYLLDSGECLTASEVQLCSHAVRVIGERVQVRLEGGGT
>WP_085123381.1 - HupE protein - Tistlia consotensis
MARPAESVASAQTEERGLDALLRDVAALEALGDDWPEAQRRAAEARVRAVDALNAEAFRRLIRALKDLPGSAAVLREAAADEVVYAVLRRHGILKPSVFERVEAALDGIRPTLAGHGGDVELVSVEPPLAEVRFLGACDGCPASMLTFHAGVTKAIREGVPEIVEVRQVKSLGGGTSDSVHFTSPFAAGLSDGWRLAVRLAELPDGATRAVELEGRSLLLSRFGERVTCFENACAHLGLPLDDGEIEAGLITCAHHGFRYSLESGECLTAPEVQLQPHAVRVVGDRIDVRLTE
>WP_051953384.1 - HupE protein - Methylocapsa aurea
MNAHAQRPEDQAPRIGESVDDLVGDVERLEAVIAGWDESQRTLAFAYRHAIDDLHKNALRKLIASVKIAPGALDALREAASDPLVYAVLRHHGLIRASLQERVEQALASIRPMLASHGGDVEFVAFLPPDAVEVRFVGNCDHCPSSTLTFVAGVKQAIEEYCPEIKDVRQVKGSGTAQGKVDYVSPFSAGLEAKWRLATTLESIPEQGVKAFAVDGAPFIFSRLSRVVSCFRDACAHLGSPISGGVVAEGRITCPRHGFEYDLMSGECLTAPVAQLQAIAVRLVGERVEIRFEG
>WP_012536301.1 - HupE protein - Acidithiobacillus ferrooxidans
MATSPVPDDIGRREADTLTEDIARLGSLEKIVQGWDETQQRTVLALRDGWEAMYRECLRRLIRTVQSAPQGATGLREAAADPYVYAVLRTLGLVRPSLQERIEAALDSVRPGLEGHGGNVELVELRLPDTVILRLLGSCHGCPSSSLTLSDGVEKAIRDACPEIRHIETAGRQYAATALTGEGSEQRISPFAIGGRHPWLPAMRLEDLPRNSLLAREVLSDALLFWRDPDGDVHCYRNACAHLGMPLEEGKVDPAGVLTCPHHGFQFALESGECLTIPEVQLEPWAVRVVDGEIQVRKDHD
>WP_108179723.1 - HupE protein - Phreatobacter oligotrophus
MENGLAHPAESPGLDRLLGELRALEGLAQSWDDSARMGAKAQAEAIDALNAEAFRRLIRALKDKPGFGPALAEAAQDEVVYAVLRRHGILKPSLFERVEAALETVRPMLATHGGNAEVAAVEGNRADIRFLGACDGCPASQLTFYAGVKKAIQDQVPEITEVRQAKSLGGGGADTVHFTSPFANVPGGPWLTALTLKELPDGSTRFLELDGHAIILSRQGDQVTCFKNACAHMGLEMTDGDLANGILTCPYHGFRYALESGECLTAPEVQLQPHTVRVIGNRIEVRIQR
>WP_026607806.1 - HupE protein - Methylocapsa acidiphila
MNAHAQPSEEEARGVDQLIDDLERLEVLIAGWDESQRVIALAYRRAIDALHEGALRKLIAEVKTAPGALDALRAAAADPLVYAVLRRHGLVKPSLQERVERALASIRPMLAAHGGDVELIAFDPPDAVEVRFLGNCDHCPSSTLTFVAGVKQAIEEQCPEIKHIRQAKSAGAVGASLDFISPFASKRDGGWRYASALDEIPEQGVKSCAVNGVPLILSRLGRVVACFRDACAHLGSPISSGAVAEGRIVCPRHGFEYDLMSGECLTAPQAQLQPVAWRVVGERVEIRFED
>WP_011728268.1 - HupE protein - Mycobacterium smegmatis
MTAAVEAPELEKLAQRVDNAVRALVDLDPEARKVAEELKAALEEIHRVGLVTIVKRMRSGEATREALFELVDDPVVRMLFTLHGIIRPDTTTLAEQALAQVRPQLRSHGGDVTLVRIESGTAFVRLEGACNGCSMSAVTLRQLVETALLEGVQGVSKVEVLPNEPTPTVISIDAVLAGSTVRRRAEEGWVRAGSVDAAAVDDVTPVTVTAPDGSEVRLLLVNLGQRMSAYRNECAHEALPLDGAVLDVGNGTLTCPWHGFCYDATSGECMSAPGVQLEPLPLRIDDGDIWVRVTG
>EID13091.1 - HupE protein - Mycobacterium phlei RIVM601174
MSEAVTSPSFEELAQRVDKAVAALAQLDPEARKVAEELKNSIEAIHREALVTIVRRMRADDAARAVLFELVDDPTVRLLLSLHGIIRPDPVTEANRALQEVRPQLHDHGGDVTLVRIEDGTAFVRLHGACNGCSMSSVTLRTLVETALVDNVSAVTAVEVLPTEPEPTVIAPESLFAHRRRDGDGWVRAGRAADVPDGGLVTFSVTAPTSGRELGVLVVNVADQLTAYVNECAHEALPLDGAVLDVDNGTLTCPWHGFCYDASSGECLSAPGAQLEQLPLRVDGDDIWVRVAQ
>WP_005626355.1 - HupE protein - Mycobacterium hassiacum
MSDPVAQQPAEPSFEELAQRVDNAVAAMAQLEPKAREVAQELKDAIEAIHRAGLVTIVRRMRADDGARPVLFDLVDDPVVRLLLSLHGIIRPDPVTEANRVLQQVRPQLHDHGGDVTLVRIEDGTAYVRLHGACDGCSMSSVTLRNLVESALVENVAAVSAVEVLPNEPEPTLIAPESLFAPRLGNRDGRDGWVRAGRTTDVPASGLTTVSVTSPASGQELGVLVVNVADRLTAYRNECAHEALPLDGAVLDVDNGTLTCPWHGFCYDATNGECLSAPGAQLEQLPLRVEGDDIWVRVDR
>WP_028931747.1 - HupE protein - Pseudonocardia asaccharolytica
MTIAQATADQAAQAVEETEPSFEDLARRVDDAVRAVAALEDPARRVADELKVAVEGIHRAGLVSIVRRMRAHPAARELLFELVDDPVVRLLFSLHGIIRPDPMTEANRVLVEVRPQLQSHGGDVQLVRIEDGVAYVRLEGACNGCSMSSVTLRNLVEQALVAGVASITSVQVLPTEPSPTLIPLEALRIGSDPAAEGWVKAMPSADVPVGGLSAAALTAAGGEQAEVIVVNVHNRLSAYVNECAHEGLPLDNAMIDIANGTLTCPWHGFCYDATSGECLSAPGAQLEQLPLRLDDGHVWVRIGS
>WP_064284731.1 - HupE protein - Mycobacterium iranicum
MTAVVPGSVDTGAEFEELARRVDDAVTALGGLDPASRAIAEEVKAAVEAVHRAGLVTIVRRLREDPATRAALYELVDDPVVHLLLSIHEIVRPDPLTHANRVLVAVRPQLQSHGGDVTLVRVEDGTAYVRLEGACNGCSMSSVTLRQLVEAALIEGVPAITAVEVLPNEPTPALIPVESLRIGRDPAADGWARLGPAADVADGVLTPAQLDTGRATVDVIIVSIDHRLAAYRNECAHEALPLDNAILDLGTGTLTCPWHGFCYDAASGECLSAPGAQLEQLPLRVDRGDVWVRVQT
>WP_003925672.1 - HupE protein - Mycobacterium thermoresistibile
MSTTTAAASPAGAAPDAAADAGAREFEALAERVDKAIAALAELDERSRKVADEVRAAIEEVHRVGLTTIVRRMRADEGAKQVLFELVDDPVVRMLLSLHGIIRPDPVTQAHRALEAVRPQLHSHGGDVTLVRVEDGVAQVRLEGACNGCSMSAVTLRDLVTGTLTEQVPAITRVEVLPNEPSPTLIPVEALRIGLDLRDDGWVGAGPAADIAEGTLAVRQLRTGSGDRVGVIIVNVDQRFAVYRNECAHEGLPLDNAVLDTADGTLTCPWHGFCYDAASGECLSAPGAQLEQLPLRIDRGELWVRVGP
>WP_013133451.1 - HupE protein - Thermobispora bispora
MSTTAQTTSITELAERVDEAARRVAGLDPEARKAAEELKEAVEAVHRAGLITIVRRMRADERARELLFELVDEPEVRMLFMLHGIIRPDPMTEASRVIDAIRPMVRSHGGDVELVRVEDGVAYVRLKGACTGCSAPAVALREGIEEALIERVPAITRVEVLPPEPSPVLIPLSAVRFGRDDGWVRAIPVEQVPDGRITPLHLTAKDGTEQEAIVVRLGDRFTAYVNECAHQAMPLDDALLDREAGTITCPWHGFSFDAESGECLSMPGAQLERLPLRIDDGHVWIKVGS
>WP_005476258.1 - HupE protein - Streptomyces bottropensis
MTSTAARSDTSTSTEGAFEELARAVDAAVTAARALEGHAHTVAENLKEAIEAAHQAALVTIVRRLRADEAGRNALYELVDDPLVRMLLSLHGILRPDPMMETGAVLDTVRPGLQSHGGDVELVRIENGTAYVRLSGACNGCSMSSVTMRNTIEQALIQGVASISSVEVLPSEPSPALIPLESVRRRVESPEEAREAGWVQTAAATEIPDGEISQMRLTDASGQQVEIIVVRIGAGLTAYRNECAHMGLPLDGALLDVTAATLTCPWHGFCFDALSGDCLSAPGAALEQLPLRVDDGHVWIRIGA
>WP_013678347.1 - HupE protein - Pseudonocardia dioxanivorans
MTASTKSTPAASSGPAATEAEPSFEDLAGRVDRAVEAASALDGAAGEAAAELRAAIEEIHRVGLRAIVRAMRERPETRDLLFTLVDDPVVHLLLSLHGIVRPDPATHAQRVLTTVRPQLQSHGGDVAFAHVADGVAYVRLEGACNGCSMSAVTLRNLVEEALVAQVPAIRSVEVLPNEPTPTLISVESMFPRSTGLPPGWVDGLGTDDVAPGALAAVQLAADDGTGADVIVVNVDNRISAYRNACAHEGLPLDGALLDVRAGTLTCPWHGFCYDATSGECLSAPGAQLEQLPVRVDGDRIWVRVHT
>WP_028656397.1 - HupE protein - Nocardioides sp. J54
MTSLADRPVAPAPEDRDVEVLAQALDDAVAALAEVTDPSGQRVAQALRSSLEDVHRAALVHVVRRLRDDARGKELLFEIVDEPVVRMVLLMHGIIRPDPMTLARQALEQVRPQLQSHGGDVELVRIEGGTAFVRLSGACNGCSMSAVTMRNGVEEALKAQVPGIEGVEVLPNEPGPTLIPLGEVGIRTATPERGWVRSLPIGEFTLDAITAVELVPDGAPAVDAIVVNVGGQLSAYVNECAHLAMPLDDAELDTSDGSLTCAHHGYCFDALSGECRTFPGAQLEQLPLRVEDGEVWIRVSA
>WP_006368954.1 - HupE protein - Gordonia polyisoprenivorans
MTTQQERPTQAPAASPTMEELAKAVDDAATAVAALPAESRTVAEGLREALDALNKAALTAIVRRLRDDDTTREALFELVDDPVVHLAMMVHGLLRPDPLTAARQALTAVEPMIAAHGGSAEVVRVDDRIAYIRLGGSCNGCSMTDQTLRTTVSEAIVSAVPAIDAVELDTAPAPTSSAAFIPLGEISVRTAESGWVDAGAVAEIPRGELVVRSLTDEHGESAEVIIVNIGGTLHSYLNVCAHQGLPLDEALIDETEGTLTCPWHALCYDATDGECMSLPGAALEQRPLRQDGNRVWVRPRG
>WP_006335062.1 - HupE protein - Gordonia rhizosphera
MTTQQERPTTPAAHDKQAPGMEDLARAVDDAAAKVADLPPEHRDVAEQLRGALDNLNKAALTTIVRALRDDDRGRELLFDIVDDPVVRLALMVHGIIRPDPLTAARQAVVAVEPMIGAHGGGVEVVRVDERVAYVRLSGACDGCSMSEQTLRDTVTEAIVSAVPAIDAVELVEPEPQTPAAFIPLGDITVRASDTGWIDAAAVGEIPRGELVARTLTDPYGASEDIIVVNLEGTLTAFLNVCAHQGLPLDDALIDEREGTLTCPWHALCYDATDGECMSLPGAALEQRPVRVDGDRVWVRLHG
>WP_108665034.1 - HupE protein - Euzebya rosea
MSTTTEREVAADQPTLTRLAGRVDAAMAALSGLDHDARAVAKEVKASLEAFHGEALRRVVRRLKDDDRGRELLMELVDDDLVRATLGLHGILRPPVHVQAERALAGVRPYLESHGGGVSLVEITDDGVARVRLEGACNGCSMSAQTLTNAVQVALVEGVPEIGGIEVVTEQAVNLISPESLTRRPQPSGPATSDGPGAPVREAGSEAGWVRGPGLLEIGDPGATIARTDLGEILVVQDGGVVAAYRNQCGHLGLSLEDADVGAGKVICAHHGYRFDVATGAGLTEPGSALSPIPSRVEGVHVWLRPGS
>WP_083876278.1 - HupE protein - Kineosphaera limosa
MMSEQTAIRPPTTVGDETTAQAPVDEGALEALARTLDEGEPAQQLAAFTTLHRQALVTIVRRLREDPSGKELLFELVDDPHVHMMLAVHGIVRADPTTRARQILEAAKPVLTEQKCSAELLTIDEGVIRLRFDGPSGCDSPTGRLKPELEAALLAGIPAVRSVVYVDPPRAPVLLGGIGLRPDATPSAPADPGPGWVRTFPVERITPGSLEAVSLRRDAEQAALSGSPGSESTEAIIVNAAGRFTAYVNSCAHQGLPLDEAEVDAARGTITCPWHGLCFDAVEGECLTLPGARLQPLDLQVLDGHIWVKVAC
>WP_007304273.1 - HupE protein - Crocosphaera watsonii
MTQLTTEKRQSLEDLIAEIGRYEQIVIQWDKNQQVVVERLKEAIESLHKEALTRLIKTVKKEALPALREAVEDELVYGILRYHDLIKPPTPPLEKRIEQALESVRPGLKSHHGDVELVAIKLPDTVEVQLVGTCSNCPASTLTMKQGVEQAIKTYCPEITKVISVNHTVTYTGEKIDSPFATSQDAGWVALARVDEIPNGGILPLEVEGLKLILVRKNNIIKGYRNSCMHLAMPLDTGEVENGVLTCLHHGFKYRLETGECLTSPGMFLEAYPVKRSGEKVLIKVA
>WP_015213936.1 - HupE protein - Anabaena cylindrica
MNQLEELVEDINRFEAIIAEWDESQRCVAVGLKRSIEALHKAALTNLIKSLKQNNMSGLRDAVSDEIVYAVLLYHELVKPPLAERIQTALAEVRPGLQSHNGDIELVAIKPPDTVEVKLIGSCSSCPSSTLTLTQGVEEAIKKHCPEITKVIAVNSSPNVTETNFNSPFPLPTDFYWVRVATVDQINKSSVLSVRIANQDLILNRQGENITCYRNSCSHLGYPLDKGKVEKGIITCSAHEFQYDLKTGKCLTTPDISLHSYPVKIKGDKVYIKVPNSNQK
>WP_009782481.1 - HupE protein - Lyngbya sp. PCC 8106
MTSTQISPEDGVTLEDLVKEIKFFENTVLEWHDPEKLLVVEGLKQSIEALHKEALTRLIRSVKQESLSALRHAVEDEVVYGLLRYHELIKPPQPPLENRIQQALEEVRPGLKSHSGDVELVAIKLPDTVEVKLVGTCSNCPASTLTLKQGVEQAIKNHCPEINHVISVNTPVSANNSDSITSPFAANQEVGWVAITTIEEIPDGGILAVELDGLKLIITQFADKIQAYRNSCTHLAMPLDKGKIQDGILTCPFHHFQYNLTTGECLTAPEMPLQPYPIKRVGERVLVRI
>WP_023069059.1 - HupE protein - Lyngbya aestuarii
MTSTQISPEDGVTLEDLVKEIKFFENTVLEWHDPEKLLVVEGLKQSIEALHKEALTRLIRSVKQESLSALRHAVEDEVVYGILRYHELVKPPQPPLETRIQQALEEVRPGLKSHSGDVELVAIKLPDTVEVKLVGTCSNCPASTLTLKQGVEQAIKNHCPEIQQVISVNTPVSTNNSHSIISPFSADNEAGWVAITTIEEIPDGGILAVELDGLKLIITQFADKIQAYRNSCTHLAMPLDKGKIQDGILTCPFHHFQYNLTTGDCLTAPEMPLQPYPVKQVGERVLVRV
>WP_012407172.1 - HupE protein - Nostoc punctiforme
MTNLEELIQEINRFEAIISEWDESQRCVAVGLKRAIEALHKAALTNLIKNLKQESMPALRHAVADELVYAVLLYHELVKPPKPPLAQRIETALEEVRPGLKSHDGDVELVAIKSPDTVEVRLIGTCSSCPASTLTLSQGVEQAIKNHCPEITKVVAVNNSPAVNNANSGLISPFSSKITCTWMKVATLDEVPEFSVVVVQLAGTSLILHRQGVTVKCYRNACTHLGSPLEKGKVENGIITCPAHGFQYKLETGKCLTVPDVSLQSYPVKVKDDKVFVKLQK
>WP_124143867.1 - HupE protein - Okeania hirsuta
MTQAKLPLQESVSLESLVSDINHFEQVIAHWDENQKVVVEGLKNAIEALHKEALTRLIRSVKQESMPALRQAVQDEVVYSLLRYHELIKPPTPSLEIRVQQALDRVRPGLQSHNGNVELLAIKLPDTVEVKLVGNCSNCPASTLTMKDGVEQAIKTHCPEIKNVVSVNTPVSGKTSNTIASPFAAQEETGWVALANIDQIPKGGILAVDMDGLKLILTRVGNDVIAYRNSCSHLAKPLDEGEVIEGILTCPFHNFKYNLATGQCLTAPEMTLQQYPVTIRSGRILIKF
>CDN14307.1 - HupE protein - Richelia intracellularis
MTSLEELVTEISQFEAIIADWDETQRGVAFALKRAIEELHKEAITRLIKSVKQESMTSLRHAVKDEVVYAVLLYHELIKPPKPPLEQRIQTALDEVRPGLKSHNGDVELVAIKPPDTVEVRLMGSCSNCPASTLTLYQGVEQAIKTHCREITRVIAVTNNSSHGIKNHDITSPFSQETTSSWFKVTDIDKIPELSVLPVQIEGESLILYRQGMNITCYRNICTHLASPLDTDNVEDGVITCPSHGFQYRLDTGESLTFSDVSLQPYPLKLEENMVFVELKNS
>WP_009545669.1 - HupE protein - Cyanothece spp.
MTQGTTEKTQTLEQLINEISRYEQIVNQWDNNQQVVVERLKEAIENLHKEALSRLIKTVKKEALPSLREAVKDELVYGLLRYHDLIKPPNPPLEKRLEQALATVRPGLKSHHGDVELVAIKLPNTVEVKLVGTCSNCPASTLTMKQGIEQAIKTYCPEITNVISVNHTVTYTGDKIESPFATSQDAGWVALARVDEIPNGGILPLEIEGLKLILVRNNEMVKGYRNSCMHLALPLDTGEIEKGVLTCLHHGFQYRLETGECLTSPGMFLEAYPVKRRGEKVLVKIA
>WP_008274189.1 - HupE protein - Cyanothece sp. CCY0110
MTQLTTEKQQTLEKLIEEISRYEQIVNQWDKNQQVAVERLKEAIENLHKEALTRLIKTLKKEALPALREAIQDELVYGLLRYHDLLKPPTPPLEKRIQQALETVRPGLKSHHGDVELVAIKLPDTVEVQLVGTCSNCPASTLTMKQGVEQAIKTYCPEIKNVISVNNTVTYTGDKIESPFATSQDAGWVALARVDEIPNGGILPLEIEGLKLILVRKDEIVKGYRNSCMHLAMSLDTGEIENGILTCLHHGFQYHLETGECLTSPGIFLETYPVKRRGEKVLVKIA
>WP_096570887.1 - HupE protein - Sphaerospermopsis kisseleviana
MDNLNELIADIQRFEAIISDWDESQRCVAVALKSAVEALHKAALTNLIKSLKKDNLAALSNAVNDDIVYAVLLYHNLVKLPLSERIKTALAEIRPSLQSHNGDVELVAIKPPDTVEVKLIGSCSNCASSTLTLTQLVEQTIKNHCPEITKIVAVNNTPNSTIATIPTNSYWVRVTNVNELPENQILGVRIENHNLILYKQDNKVHCYGNACSHLGFPLDKGKVKNGIITCASHQFEYDLNTGKCLTVPDISLQSYQVQVKGDKVYVQV
>WP_012599188.1 - HupE protein - Cyanothece sp. PCC 7424
MTQGNMPPVTDAPTTLDRLVGEIGRFESIVAQWDHNQQVVVTELKKSIEALHKEALTRLIRRLKQEKATAALRNAVEDEIVYGLLRYHELIKPPQPPLEKRIQQALDEVRPGLKSHNGDVELVAIELPDTVKVRLVGTCSNCPASTLTMKQGVEQTIKNYCPEITQVISINTPSTHQKLSSPLLVGEGLGERLNEPDYINSPFSSEQETGWIALTTREEIPDGGILGIEIDHLKLILYRNGDHILGYRNSCTHLGMPLDTGTVQEGILTCPFHDFQYRLDTGECLSVPQLYLEPYPIKSSGDRILVKIL
>WP_017656013.1 - HupE protein - Fortiea contorta
MITLIEHTATLEELIEEINRFEAIISEWDESQRCVVVGLKRAIEALHKAALKRLIKSLKTESMSALRHAVTDEVVYAVLLYHELVKPPKPPLAERIQIALNQVRPGLQSHNGDIELVAIKPPNTVEIRLTGTCSNCPTSTLTLSQGVEQAIKTHCPEITTVVAINHLPSSENNTANLVSPFNNQSVSTWIKVTTVNQIPEAGILSITIAGNSLIFYRQGMNITCYHNACTHLGNSLTEGKVENSILTCPVHGFQYKLATGECLTAPDVSLQSYPLRVKQEQIFVQLPQ
>WP_107806823.1 - HupE protein - Nodularia spumigena
MTKLEELIQEINRFEAIISQWEESQRCVAVGLKRAIEDLHKAALTHLIKSLKQESMSALRQAVDDDIVYSVLLYHELIKPPKAPLIERINTALEEVRPGLKSHDGDVEFVAIKPPDTVEVKLIGSCSSCPTSTLTLTQSVEQAIKNHCPEITKVVAVNHTSTVNSPFTPEDTATWVKLTTIDQIPESGILTGKVGKNSLILYRQGENITCYLNACPHLATPLDMGKLDNGILTCKSHGFQYNLETGECLTVADVPLQSYPVQIKGEKVFVKLPKYSI
>WP_127055920.1 - HupE protein - Trichormus variabilis
MTQLEELITDINRFEAIISEWDESQRCIAVGLQRSIESLHKVALTNLIKSLKQENLSALNQAVNDEVVYAVLLYHNLVKPPLSERIQTALAEVRPSLQNHQGDVELVAIKLPDTVEVKLIGSCSNCATSTLTLTQGIEQTIKKYCPEITRVVAVNGNSHPPANSLPTDSYWVKATTLDSIIENRILAVRVANNDVIMYRQDDNISCYQNSCSHLGFPLDKGKVEKAIITCSAHNFQYNLNTGECLTVPNVSLQSYEVRVKGENVYVKVENSHRR
>WP_013321761.1 - HupE protein - Cyanothece sp. PCC 7822
MTQGNLHPVTDAPTTLETLVGEIGRFENIVAQWDKNQQVVVTELKKSIEALHKEALTRLIRHLKQEKAGAALKSAVQDEIVYGLLRYHELIKPPQPPLEKRLNQALEEVRPGLKSHNGDVELVAIELPDTVKVRLVGTCSNCPASTLTMKQGVEQTIKNYCPEITHVISVNTSVVPEKGLGVISPFSEDLEAGWIALTTLDEIPDGGILGLEIDKQKLILYRKGEQIWGYRNSCNHLGMPLDTGTVEQGILTCPFHEFQYRLETGECLSVPQLFLEPYPIKRSGDRILTRII
>WP_013192393.1 - HupE protein - Trichormus azollae
MDNLENLIGDIQRFDAIISEWDESQRCVAVGLQRAIESLHKAALTNLVRSLKQDNISALYNAVDDEIVYAVLLYHNLVKPPLSERIKTALTEIRPSLQSHDSDVELVAIKPPDRIDVKLIGSCSNCASSTLTLTQLVEQTVKKYCPEISNIVAVNNSPNATLTPININSYWMGVANVNDIPDNHVLAVKLENQNIFLYRQGNNIICYRNACSHLGLPLDKGKVENDIITCASHQFRYDLKTAECLTVRDVSLQSYEVRVKGDKVYVKVEK
>WP_015115404.1 - HupE protein - Nostoc sp. PCC 7107
MTNLEEFVEEINRFEAIISEWDESQRCVAVGLKRAIEALHKEALTRLIKSLKQESISALRQAADDEVVYAVLLYHDLVKPPLPPILQRIQAALEEVRPGLKSHNGDIELVAFKPPDTVEVKLIGTCSSCPASHLTLSQGVEQSIKNYCPEINNVVAVGDRSTVDNTNTGLTTPFPPTITTAWVRVATVEQIPDLGIYAPKVAGHALILYRQGDRITCYRNACSHLASPLDTGKVENGIITCPVHGFQYQLDTGQCLTADVPLQSYLVQIKGDKVFVKFSR
>WP_088894440.1 - HupE protein - Leptolyngbya ohadii
MVQAPSPTDHSVSTLDGLIADINQFEAIANHWDDAQRATVSGLKRSIEALHREALVRLIRSVKQESMSALRQAIEDEVVYSVLRYHDLVKPPQPPLEYRLQQALEAVRPGLQSHSGDIELVAIKLPDTVEVRLTGTCSHCPAATLTLTDGVEQTIRRYCPEITRVVAVRNDVPNEATDDVAVSSCQSAASIDSGWLEVTSLAEVPIDRVLAMKLEGRSILLSRIESFESFKSGVVCYQNACSHLGVSLEDGAIESGVLVCPHHGFRYRLATGECLTSPEMPLQSYPVEVRDGQVFVKLWD
>WP_012872945.1 - HhyE protein - Sphaerobacter thermophilus
MVGRTGTRPDDRAARLDAMLARIESFPEPELRDQALGAIQELLAFYGDGLGRALAILVARDPTLPAALAEDELVAHILLLHGLHPVPVEERVGQALDRVRPYLHSHGGDVDLLEIVDGVARVRLRGTCRGCPASAVTLRLAIERAVHELAPDLDGIEAVTDDAPVPREPGILANGAAGAAAGDWTTVGRLELPRGEARLCRVEGVSLLVLDLDGTLYAYRDGCPRCGTSLAGNRLAGQVLVCPGCGSRYDARLAGRCLDAPEHYLEPVPLLVDAGIVRVALPTVTPEAAS
>WP_010587702.1 - HhyE protein - Schlesneria paludicola
MTEQATLHTRLEMIDTLVARLDHLADEEVRDTATELVQLVMELHRTGLERLLKIVTQQIATSEGAILRLAEDQLVAGLLLLHELHPVDLVTRVGRALEQVRPYLKSHGGNVELLEIDEGLVRLQLQGSCHGCPSSAMTLKMAIEEAISEHAPDVLGLEVEGVVPASLPGFIPLESFEHAADAASAMQWEEIAGLHDLADGEVDTRDLHDQSVLFLRLNTGLYAYQNGCSHCGNSLKTGTLSGSVLSCPDCGTQFDVMRAGRCLDLPALHLEPLPLLQSGGKTRIALAVSP
>PZR71543.1 - HhyE protein - AD3 bacterium
MAILQRKEFDRRLQQTESLINEVEALADEEVKRRAVEAIQALLNLHGEGLERTLELISDSSNQGQALIDELGKDPVVGGLLLLHGVHPLGLEDRVLQALDKVRPYLGSHGGNVQLVGLDEGVVRLRLEGTCQGCASSAVTLKFAVEREIMEAAPDVVAIEVADDSAERPPEGFIPLGQIKPLAPKPASTDWEVVAGVGHLESGSTKVVRVGGSAVLFCSWGETTFAYRDSCPACGASLVGGDLCEAILTCAACQARFDVKLAGRGVDNELHLEPLPLLQTDGEVRLAGAAKS
>WP_041978571.1 - HhyE protein - Pyrinomonas methylaliphatogenes
MEQQMQACARRIEELVQRIESLTDARARDVAVELVQELMRMHGAALERLLEIVWGRNEPELIEAFARDDLVGPLLLLYDLHPLDQETRVREAIERVRPYLRSHGGDVELLRISDGVVHLRLRGSCHGCASSAQTLRLAIEAAIYEAAPEIAALEVEGVAQPATSFVPLESGRGNANGKRKTHGVWEEVEAPLSLAPGSARIIEARGRRILFCRLDDRFFAYEDRCPACGGALDAARFEDVMLVCPVCGRRYDVVRAGRASDGANPHLEPLPLLLEHGRAKIALPA
>PZR61736.1 - HhyE protein - WPS-2 bacterium
MDERTPALTEGHDRRSAPPDHLARRPEDPRALGDRVDALLQQLATSPNPAHARAKAEELVSTLVRLYGAGLTRILEIVDENAGDSGGRIFRHLCDDDLVASLLILHGLHPLSLEERIVQALDRVRVYLKSHEGDVQLLRIEGETVYLRMAGSCHGCPSSASTMKLAIERAIHDAAPEITEIRAEGVHDGAVTRKPTEWVSLAALPDLSDNGMASCEVEGMPVLFLRSPDALYAYRNQCPRCLVGLSRASLRWPLLACVSCGQEYDVVKAGRAPDQPELHIEPFPLVVSGDKVQLAIPVVA
>WP_076006436.1 - HhyE protein - Sulfobacillus thermosulfidooxidans
MDAMTTQFEALVEAVDQKLESIEKTSVPGFRQQVGELVNDLLEMYRMGFEQVMHYAHSYPGLPQKFAEDPVLGPLLMIHNMHPLSFEERVNKALENVRPYLKTHDGNVRLISVEQGIVTLALEGHCQGCPSSRITIKTAIEQELMRLAPDMLDLIVEGEDHLEAMNADDSSRVVIPLSAVQGVTVKSRRTTGWFALDNITTLSSGSAQKTRVEDHPVIIARLGDEFFAYHDYCPQCRHGNQLALRVKDSALECQSCHALYDARRAGRSIDHTSYHLEPLPLLIEGHDARIAMPVAE
>WP_007412924.1 - HhyE protein - Pedosphaera parvula
MSLNPATHDHTNPVSQTIPPKSNGAVRPIDELNEQGRRVQELVDQVDAVADPATRALLQDCLQSVLALHGQGLAQVLQVVQDSGYEGQKVFDRLIHDSVVRRLLLIHGLHPVNLEARLLEALDKVRPYMESHGGNVELISLVNDKACLRLQGTCKSCPSSAITLELAVRHAIEEACPDLIGFEVEGAVEPTTLDQTSSDAKFQPASWTLLEDLAQLNNDNLRVIETKGISLLICKVNENLYAYRNLCPACGLAFKSDGLEEGQLKCPIGHRYDAQRAGAGVHNLDLHLDPFPLLVENGRVKVSLR
>WP_008474747.1 - HhyE protein - Nitrolancea hollandica
MSRDPGILDLLVEDEMIAHLLLLHGLHPLDLPTRVAKALDQVRPYLQSHGGDVELLGLEDGIARVRLQGSCRGCPSSSMTLKLAVEDAIQRFAPEIDGIEAENTAPVGPTGFVPLASIQRNGSGPDQNGSSWLVVKDLLPLGSDEARAMEIGGSPLVFLKLENTLYAYRNQCPGCGEPLNRATLAGQELICPVCRHRYDVRRAGRCLNAPDLHLDPVPLLVEADTVKIALPVAMS
>WP_003894102.1 - HhyE protein - Mycobacterium smegmatis
MAPAVTPLADVPVDTQSDDEARWRTAGERIESLLDAAAGPTARARAEQLVREVTDLYGAALERMLRAAVTAAPELAETFAADDLVASLLLVHGLHPHPVHRRIADALDRVRPYLGSHGGDVRLLDVVPEADGAVARLRFSGSCKSCPSSAATLELAISDAVLAAAPEVSSIEVVNAEPEPAAVIPAQSLLARVHSDGRRHVEWHAVPELDGLSPGQVGGFRVDGATVMACRVGDDYFAYHDRCAWCGSTFAGAVLTGQVLRCPHCATGFDVVHAGLSDSAQLEPVPVLMRDGVPTLALRSTSGGAGP
>WP_014815376.1 - HhyE protein - Mycobacterium chubuense
MAPTAARDDERWRTAGDRIQTLLDASAAGGTVARERAEQLVREITDLYGAALERMLGAAVTANPELAEDFAADGLVASLLLVHGLHPHTVEQRVSAALDGVRPYLGSHGGDVSLLGVADGVVSLRFQGSCRSCPSSAVTLELAVQDAIRAAAPEVSDIEVLAAETDSPAAVIPADALLSRVHAHTTTWCGVPELAGLSDAEVGGFRVAGMTVLACRVGAEVFAYHDRCPGCSGSLAGARLSGAVLRCPHCAAGYDVVLAGAGVDAGVADGHLEPIPLLERDGVLSMAVTPAVEVA
>WP_063472509.1 - HhyE protein - Mycobacterium kansasii
MADRPDTPENDTHWRTAGDRIQTLLDSCAAAGTTAHERAQQLVREVVGLYGAGLERIMRSLDDPGLAERLATDDLVASLLLVHGLHPHDVHRRVTDALARVRPYLGSHGGDVDLIEVTDTVVRLAFTGSCKSCPSSAVTLELAVQDAIRAAAPEICSIELVANAKSGTVIPAETLLARVHSNGHDATSWHPVPELDDLAPGEVGGFLVDGTTLLACRVGDQTFAYRDHCPVCDDTLAGAELCDALLRCPRCDTGFDVVRAGASANGAHLDPLPLLPRDGVLSVALPEALGASA
>WP_006242885.1 - HhyE protein - Mycobacterium tusciae
MAGRPDEFAQDAQWRTAGDRIQTLLDASAAGGSVARERAERLVGEVTDLYGAGLERILQIAVCADPSLVEKFAGDDLVASLLLVHGLHPHGVERRIEDALDGVRPYLGSHGGDVTLLEVVDDVVRLQFSGSCKSCPSSAVTLELTVEDAVRAAAPEIASIEVVAAEAVTSTAVISAESLLSRVHKNVHGPATWHAVPDLVDLAPGEVGGFRVAGTTVLACRIGDELFAYQDRCGQCEGSLTGAALHRPLGAAIGEALLRCPRCRAHFDVVHAGAGVDENADSTVHLDPIPLLIRDGVLSIAVAAVPTQAVMT
>WP_003922138.1 - HhyE protein - Mycobacterium xenopi
MADRPEEFEGDAQWRTAGDRIQTLLDATSAAGSAARERAEQLVREVVELYGAGLKRIVEMIDDPGLVERLAGDDLVASLLLVHGLHPHDLERRVADALDRVRPYLGSHGGDVHLLDIVGDTVRLRFSGSCKSCPSSALTLELAVEDAVRAAAPEISSIEVVAAEADSTHIIPAESLLAKVHSNGAAWHQVPDIAELAPGEVGGFFVAGVSILACRVGEQLYAYRDYCPVCEGSLAGAALHRADDTGAPVLRCPRCRNDFDVVHAGAGLGDPAAHLDPFPLLVRDGVLSVAVPTEPMGASA
>WP_095794473.1 - HhyE protein - Mycobacterium avium
MADRPDESAKDAQWRTAGDRIQTLLDASAAAGSVARQRAERLVGEVTDLYGAGLERILQIAVCADPSLVEKFAADDLVASLLLVHGLHPHDVERRVEDALDGVRPYLGSHGGDVTLLEVVDDVVRLEFAGSCKSCPSSAVTLELTVEDAVRAAAPEIVSIEVVAAEAAPSAAVISAESLLSRVHENGRHGPATWHAVPEFADLAPGEVGGFRVAGTTVLACRIGDELFAYLDRCGRCESSLAGAALHRPLGAAIGEALLRCPRCRAHFDVVHAGAAADENADATVHLDPIPLLVRDGVLSVAVAAVPTETVMT
>WP_036455426.1 - HhyE protein - Mycobacterium marinum
MADRPETPSEPTQAISESDVQWRTAGDRIQTLLDSCAAGGAAAQERASQLVREVVGLYGAGLERIMRLLSQPGLDPDAHIDLAERLATDDLVASLLLVHGLHPHDVHRRVSDALDGVRPYLGSHGGDVELIDVVTGRSGDITVRLAFTGSCKSCPSSAVTLELAVQDAVRAAAPEISAIEVVAAEPAGTAGVIPAESLLSRVHSNGTDASSATSWHPVPELAELVPGEVAGFAIGDTTLLACRVGEQVLAYRDHCPICRDSLAGARLLGTLLRCPGCRTDFDVVRAGVPAGAGRQELHLDPLPLLIRDGVPSIALRGQELGAIA
>WP_075233750.1 - HhyE protein - Mycobacterium colombiense
MADRPGKSANDAQWREAGDRIQTLLDSCAAGGAAAYDRAQQLVREVVGLYGAGLERIMRMAGDPEPAGGLVERLATDDLVASLLLVHGLHPHDIHRRVSDALDRVRPYLGSHGGDVDLLEVVPGGHPEEFTVRLAFTGSCKSCPSSAVTLELAVQDAVRAAAPEISSIEVVTAEATTAPASVIPAESLLAHLHSNGHGSTAWHPAPELAELTPGEVAGFVIGGVTVLACRVGDQTFAYRDQCPVCDDSLAGSHLHGRMLRCAGCRTEFDVVGAGAAATGGSAGHLDPMPLLTRDGVLSVALRADALGAPA
>WP_003933588.1 - HhyE protein - Mycobacterium vaccae
MAPPTPRRLDDARWRAAGGRMETLIDGIGASGAAARERAENLVREVTDLYGAALERMTDLAVAAKPELAQAFADDDLVASLLLVHGLHPHGVERRVADALAGVRPYLGSHGGDVSLLGVTDGVVRLQLLGSCKSCPSSSVTLELAVQDAVRAAAPDIEAIEVVAAEPDPESTTIPASSLMSRVRAAGGPARWIPVPQLAELADGEVGGFRVEDTSALACRVGGAVFAYRDRCPACAGSLAGARLAGPVLHCPRCAAGFDVVHAGCGVGGDGHLQPIPLLERDGVLCLAVSAPAEVA
>WP_007171455.1 - HhyE protein - Mycobacterium parascrofulaceum
MGGEPVDRPEARDDGDARWRTAGDRIQTLLDSCAAGGAAAQERARELVREVVGLYGAGLERIMLLAQEGPRDGPGPGLAERLATDDLVASLLLVHGLHPHDLHRRVSDALDRVRPYLGSHGGDVDLLEITDDGVVRLAFAGSCKSCPSSAVTLELAVQDAVCAAAPEVSSIEAVTAESAPGPAVIPTESLLAHVHSTSSAWHPVPELAELAPGEVAGFLVSDVQLLVCRIGDLPLAYRDHCPVCAGSLAGARLRETLLGCPRCGTQFDVVHAGAGAGGTHLEPLPLLVRDGVPSVALAEPMGAPA
>WP_005141691.1 - HhyE protein - Mycobacterium rhodesiae
MDHDSHWRSAGERIQNLLDASAVGGRVAAARAEQLVREVVDLYGAALTRVVELLGAAATDRLAADDLIASLLLVHGLHPHDVVRRVSHALDTVRPYLGSHGGDVRLVDITDGVVRLAFSGSCKSCPSSTVTLELAVHDAVRAAAPEIVAIEVVPADPAASATVIPVDALMSRIQESARPSVTWYPVPELAELAPGEVAGFAVDGTVVLACRAGADVLAYLDRCPACAGSLAGAALSGDVLRCPRCHARYDVVHAGIGIAGTAEHLDPVPVLIREGVLSLAITGEPIGAPA
>WP_015355235.1 - HhyE protein - Mycobacterium liflandii
MADRPETPSEPTQAISESDVQWRTAGDRIQTLLDSCAAGGAAAQERASQLVREVVGLYGAGLERIMRLLSQPGLDPDAHIDLAERLATDDLVASLLLVHGLHPHDVHRRVSDALDGVRPYLGSHGGDVDLIDVVTGRSGDITVRLAFTGSCKSCPSSAVTLELAVQDAVRAAAPEIAAIEVVAAEPASTAGVIPAESLLSRVHSNGSNASRATSWHPVPELAELVPGEVAGFAIGDTTLLACRVGEQVLAYRDHCPICRDSLAGAQLLGTLLRCPGCRTDFDVVQAGVPAGAGHQELHLDPLPLLIRDGVPSIALRGQELGAIA
>WP_018161884.1 - HhyE protein - Smaragdicoccus niigatensis
MPGEVGTNDDHWRSAGERIQNLLDAMSAGGPAVRERAEMLVHEVADLYGSALSRVAASVPAPTLDRLAADELVASLLLVHGLHPHDLQQRVADALERVRPYLGSHGGDVKLLSVADNVVKLQFAGSCQSCPSSSVTLEFAVEDAIRAAAPEIEEIEVVPAEKAEKVIPAASLFSKVHANGTSWHHVPEIASLTAGEVGGFAVNGATVLACRVGDELYAYRDRCPACLSSMAGAVLHRGTGASPAVLRCPRCRSHFDVVHAGASLDSDTHLDPLPLLMRDGVLSVAIPAGVSG
>WP_006334827.1 - HhyE protein - Gordonia rhizosphera
MEEPGATEGVAMPDRSTHDVDDGRWRAAGDRIETLLDASSVNGAAARDRAEALVREVAELYGAGLERIVALLDPQVTEALVADELLASLLLVHGLHPHDVRTRVESAIDRVRPYLGSHGGDVAVVGVSDGVVRLELSGSCRTCPSSSVTLELAVEEAVRAAAPEVSAIEVVTADRAPSGLIAADSLFDTVHSRSGTRGSWEPVPQVADLESGDVGGFSVGGVPIFVCRLGDDWYAYHDRCPNCGHSLAGVVVEVDGDAPDGTAILSCPTCATRYDAVHAGRGLDGDAHLDPLPLLTRDGSPVIAVPAGAVR
>WP_124258523.1 - HhyE protein - Rhodococcus ruber
MERWRESGERIEALLDASSAAGPAARERAEDLVREVMGLYGAGLAGICEALARHPGAMDDLARDDLVASLLLIHGLHPHDVETRVRTALDGVRPYLGSHGGDVELVAIRDDVVRLRLLGSCHGCPSSAVTLELAVQDAVRAAAPEITELEVETAGSTGQGLIPAAALFTRVHSDVRGTWCAAPELDEIPEGEVGGFVVAGLPVLVCRVAGELLAYRDRCPVCTHAFAGAALHRGAGADAAVLRCPTCAAHFDVRGAGVRLDAGDEHLEPVPVLVRDGVLSVAVPAGVA
>WP_037204393.1 - HhyE protein - Rhodococcus opacus
MARDRAEQLVREVVELYGAGLQRVLEIIGDRDDDLVERLAADELVASLLLVNGLHPHDVETRVATALDSVRPYLGSHGGDVELLGVVNGVVRLRLTGSCQSCPSSAVTLELAVKDAVLAAAPETVDIEVVGATPAAGSGLIAAESLFSHVHPNGTDGSSGTGTWISVPELEDLAPGEVAGFAVAGLPILVCRIGEQLFAYRDRCAACTNSLAGATLLRRAGGQVGDAVLRCPSCRAHFDARRAGLRLDGDADAETLSPLPVLVRDGVVSVAVPAAEVA
>WP_039952884.1 - HhyE protein - Rhodococcus imtechensis
MARDRAEQLVREVVELYGAGLQRVLQIIGDRDDDLVERLAADELVASLLLVNGLHPHDVETRVATALDSVRPYLGSHGGDVELLGVVNGVVRLRLTGSCQSCPSSAVTLELAVKDAVLAAAPETVDIEVVGATPAAGSGLIAAESLFSHVHPNGTDGSSGTGTWISVPELEDLAPGEVAGFAVAGLPILVCRIGEQLFAYRDRCAACTNSLAGATLQRKAGGQVGDAVLRCPSCRAHFDPRRAGLRLDGDADAETLSPLPVLVRDGVVSVAVPAAEVA
>WP_083400529.1 - HhyE protein - Rhodococcus jostii
MARERAEQLVREVVELYGAGLQRVLEIIGDRDDDLVDRLAADELVASLLLVNGLHPHGVETRVATALDSVRPYLGSHGGDVELLGVVDGVVRLRLTGSCQSCPSSAVTLELAVKDAVLSAAPETVDIEVVGATPAAGSGLIAAESLFSHVHSDGSDGSSATGTWVSVPELEELTPGEVAGFSVAGLPILVCRIGEQLFAYRDRCAACTNSLAGATLQRKAGGQVGDAVLRCPSCRAHFDPRRAGLRLDGDADAETLAPLPVLVREGVVSVAVPAAEVA
>WP_013806772.1 - HhyE protein - Hoyosella subflava
MTSRGPEQWRTAGERIDALLDAMASSGPIVRERAEHLVREVVGLYGAALEQIQALVGESDDKQLLRKLADDDLVASLLLVHGLHPDDEETRVRRALDSVRPYLGSHGGDVDLIGIEDGVVHLRFQGTCKSCPSSTATLELAVEGAIKAAAPEVTSIEAETAPAGTGQASGGAAVIAPDSLFSKVHQHANWVALPELADLADGEVGGYALGGTTVLVCRSGVDTFAFIDRCPHCLNSMAGAVLHRMAGAKAGAAVLRCPQCRTHYDVRHAGAGMDDTSEHLTPLPVLPRNGTLSVALPAGAGQ
>WP_021333533.1 - HhyE protein - Rhodococcus erythropolis
MEHSADYWRGAGERIETLLQANAGAGPVARDRAEQLVREVVQLYGAALERTVALADPAMMDAMVRDDLVSSLLLVHGLHPHDVETRVRTALDSVRPYLGSHGGDVELIEVADGVVRLRLLGSCNSCPSSSVTLETAVQDAVRAAAPETTGIDVETPDSHELKSGVISVESLFSHVHADGGGAHWVEVPEFAEVDAGEVAGFRVSDTDLLVCRSGDDLYAYRDHCPVCDHSMAGAVLERMMGLPVRDAAVLTCPTCSAHFSVYGAGARVGTGSEHLAPLPVLIRDGVLSVALADDSVLPVT
>WP_081769697.1 - HhyE protein - Nocardia nova
MAGGGAAARDRAEQLVGEVVGLYGAGLRRIIGQLDQDTLRRLLGDDLIASLLLVHGLHPDDVHTRVATALDSVRPYLGSHGGDVRLLDVTGAVVHLELTGSCRTCPSSSVTLELAVEDAVRAAAPEIETIEVVAAQPEAQSAVIEPDSLFSHVRSAGSWIAVPELDALAAGEVGGFEVAGSVVLACRVDGQIYVYRDHCPSCERSLAGAALHRGVGRGDPVLRCPVCRAHYDVVHAGARIDGDGHLEPLPVLVRDGQLSVAVPVGVSG
>WP_003801349.1 - HhyE protein - Arthrobacter globiformis
MPGGDRPPLQNGDQIGTLLDALGAGGAVARGRAEDLVRQVTDLYGAGLQRIMEILQDHGKLDDATLEALTADSLVAGLLVIHGLHPHSMEARVAAALDSVRPYLGSHGGDVELEGISPDGVVRLKLLGTCQGCPSSSVTLKYAVEEAIQNAAPEVTAIDVVEAEKQPGAPALIPVDSLLVRVNNPAGGTPAESWHDMSGGTWEPLPEVAGLEAGEVAGFLVGGYPVLACRTGQDIYAYRDYCPRCTGSMAGAVLQRALAAPVGGGLLRCPTCRGHFDVRRAGACLEDKDLHLEPLPLLVRNGVMSVAVPTVSVQSAPLPAPPVPAAPAEVTPVQALPLVTPAGVGVPAAQAPALQAAAGQDS
>WP_017611789.1 - HhyE protein - Nocardiopsis salina
MSAGRDAERVEQLMSSFAAAGPLVQNRVEELVSLVVELHGAGLERLLEIADESGALTDGVLDRIADDEQVSALLLLHGLHPDDVHTRIERALDRVRPYMGSHGGDVSLVEVDGGLVRLRMLGNCQGCPSSNATLELAVEGAVRAAAPEIEDIECDATAEEEPGPALISSESLFSRVRADQGGDEAAGRSEPASTWQTLDLDDLAPGTVRAMTVGGAGVVVCRVGTDTYAYRDRCARCRQGLEGAGLQRIVGSPSGGVAMVCPHCRAHFDVRRAGAEVAEADTHLEPLPLLDDGGLWEIALPREVPA
>WP_116175886.1 - HhyE protein - Kutzneria buriramensis
MASAGEVGDRVERLLAEFEQVADPTLAARAEELVRTVVEFYGAALERVVELAPEPVLERLADDPLVSGVLVVHDLHPHSLQQRVQHALDAVRPYLGSHSGDVSLVEITDEGVLRLALGGSCNGCPSSMVTVKLAIEQAIEHAAPEIARIDVEGAVSDPSGPQQTGPGGRPLLPIVTAEKGSWADKASWVELGEARMVAVGTVSSAQVRGAATVVCNAEGTFYAYRDRCPACREALSGGHFDGRVLSCPACGAGYDVVLAGRAVSGDGHLDPLPLLAEDGTIRVAVPA
>WP_028936741.1 - HhyE protein - Pseudonocardia spinosispora
MTPTDPQEVGQRIEALLGELGEPAVTDVAEELVRLLMGMYGAGLERIVSMLAGSALEGPALLSKLLEDDLVSSLLVLHDLHPEDTSARVARALETVRPYLGSHAGGVELLGVADEPEGVVVTLRLKGSCDGCPSSAMTVKTAIEKAIVEACPEVLRVDVEGMNEPAASVKELPLLQIQSGPPVETSWVVLDDPSLRPGQCATLDVEGCPVLLALPPGSGGLVAYRNRCPVCRGELDGAPLTGDRLFCPSCQAGYDVRKAGRALTGGLHLEPLPLVTRAGGLRLAIPRPTVGAAS
>WP_007034606.1 - HhyE protein - Amycolatopsis decaplanina
MSKTADIVGDRMERMLRELPEGRGKQITEELIRLVVGMYGEGLERVAVLLAEHDRDTLLRLADDDLVGSLLLLHDLHPVDVDTRIQRALDRVRPYLGSHAGGVEYLGVDGDGVARLRLEGNCQGCPSSSLTVKMAIEGAIEQAAPEITGVEVAGVPAPDPDPVTVLQVGMGPPDGWHAPEPSGGTASSGWSVLPDLGPPAGRPVSVPVEGLTVLVCSVRGTLYAYRDACAACGSSLGESTIDGEVLSCAGCGARFDVRLAGKGVDDGGLRLDPLPLLSDSEGVRVAVPKAVSS
>WP_132114125.1 - HhyE protein - Actinocrispum wychmicini
MSDARGVGERVEQLLGGLRPGRDKETAEELVRLLVTMYGDGLTRIMALLGDSPVVADLVADPLVESLLLLHDLHPVDVDTRIQRALDQVRPYLGSHAGGVDYLGVSEDGMAQLRLQGNCQGCPSSTVTVKMAIESAIMAAAPDIAGVAVAGVTASPELLQIGMGPPPSWNAVDVGPPNGRAKAVTVDGVQVVLCSVRGTLYAYKDMCVCGSPLGTVSIVDAVLACPTCGTRFDVRNAGRGVDDPAQHLEPLPLLSDSQGVRVAVPS
>WP_131285879.1 - HhyE protein - Kribbella sindirgiensis
MDRHDVHTLSERIDVLLDEVQRSADPALTRKVEELIRAVLTLHGAGLEQLLHLLGEPQVRQLVEDDLVAGMLLLHDLHPDDIATRVQQALDSVRPYLGSHAGGIDYLGIDADGVVHLRLQGSCDGCPGSTATVRLTVENAVLDAAPEAIAVDVEGMVKEKESLLTIQPFRPHRDSWHRLDLVPPPDQIQHLPVAGLDLLVANLAGTYFAYRNTCPRCSSGLHHGRLSGERLTCPRCTAEYDVRLAGRAQDGPPLEAIPLLPDGSGWKVAVPGVQPA
>WP_084752995.1 - HhyE protein - Kitasatospora albolonga
MAGADPGTRINELLDRLGREAGPQARETADELVRSVVEFYGEGLARTVRLLRSAPAGADPLAVLTADELVGDLLILHDLHPEDTLTRVGRALDKVRPYLGSHAGDVEVAGLDPDTAEGPTLRLRLRGSCDGCPSSTQTVRWTIEEAVARLAPEIAHIEVEGVAEAPAQQPLLQIQPRPPADAPGAPPPPAAAPEPPHWHTLAAPALPAHDHATRVADVEGNALLLVRLPGNLYAYRDRCPGCGADLRTAPLDGEFLSCAGCGARFDVRHAGRGERTHLEPLPLLEEEGAVRVALPELLGAGP
>WP_012934015.1 - HhyE protein - Conexibacter woesei
MTATVPGAGAGGGAGAESALVERVQRLTAELEALPDPAARACGEQLAAAVVQLYGEGLERIFGALERALDEGGDAAAPVAVVRDELVADGVVASLLLIHGLYPVGLEERVRAALDEVRPYLASHGGDVELLAVQEGVARLRLVGSCRGCAASASTLEAVVEQALEQAAPDLLGLDVEGAAPPSPAAAGGAPAPGAPAPGALPVAGATTWVQLDGAERIERGTLVPADDGLVVANVAGTLLAYRDRCAGCGAALHDGLLLGGTLTCAACGRAYDLPRAGRCRDEDALQLDPIPLLRERGAVRVALVR
>WP_020500149.1 - HhyE protein - Sciscionella marina
MNGERIEELLASFAANGPLSRARAEELVRLVTEFHGSGIERILEVVHETGALSTELLDRLARDDLVSGLLLLHGLHPDDARTRVEEALERVRPYLRSHGGEVKLLELTEDGVARLRLLGNCQGCPSSSVTLKLAVEAAVEAAAPEIERVESVDTGAERDGASVIPADSLLQRMLPADSSPGTHWEPVRAPDLPSGASAPMTVGGVEVLLCHLGSTMYAYRDRCGQCGQRLGQVGIPIETGTLTCPQCGTGFDVRKAGIAEFEAGVHLDPLPLLESDGQLEIALPKAVPA
>WP_078079936.1 - HhyE protein - Streptomyces niveus
MTEVTEPVTDEWRATGERIDTLIAASAAGGVAARERSEELVRLVTDFYGAGLERLLDLVHEQGRLDDELLAALAADDLVASVLLVHGLHPYSVTTRVENALESVRPYLGSHGGDVELLGVTDEGVVRLRLLGSCDGCPSSSATLELAVQGAVEAAAPEITTIEVESADETGAGDGGPLVPVDALFSRLHDADPLNGAGGEDSGATWESVPALLALEPGGVERFTAGGLPVVACRIGSDLFAFRDRCARCERPMEGATLARRLGGGSGDGVLRCAACRAHYDVRRAGACLDPEADGAHLDPLPLLADGASVSVAVPATHVVAT
